# Supplementary material
Source: PubMed Central journal article supplement (PMC3967043)
Supplement: supp_tpc.113.121111_TPC121111_Supplemental_Data.pdf [file supp_tpc.113.121111_TPC121111_Supplemental_Data.pdf]

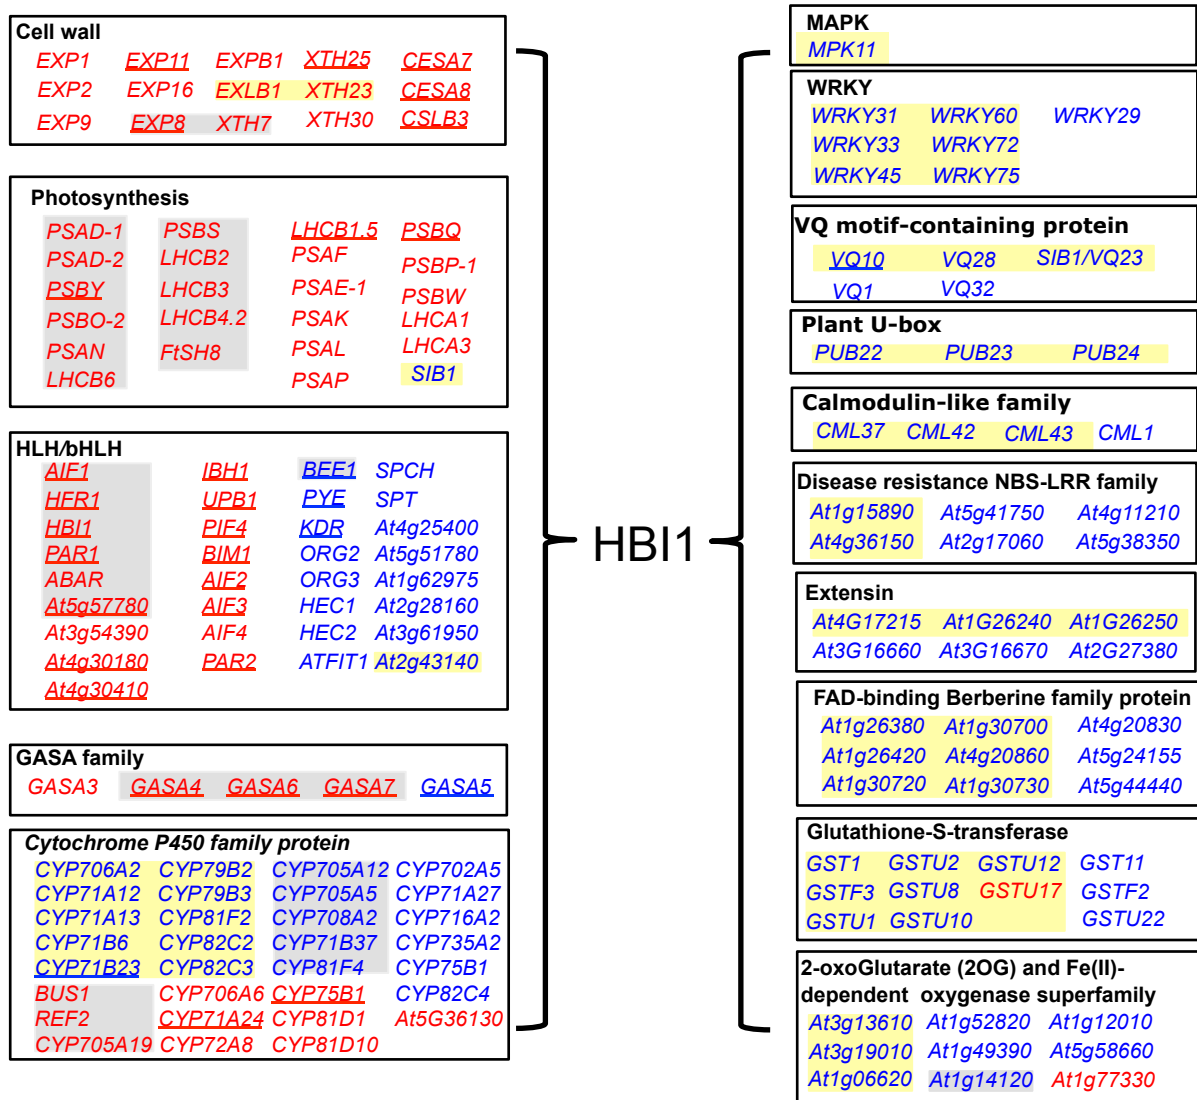

**Supplemental Figure 1. Representative HBI1-binding and HBI1-regulated genes with known functions in various developmental and cellular processes.**

Genes induced or repressed by HBI1 are in red or blue, respectively. Direct HBI1-binding target genes are underlined. Genes induced or repressed by flg22 are in yellow or gray background, respectively.

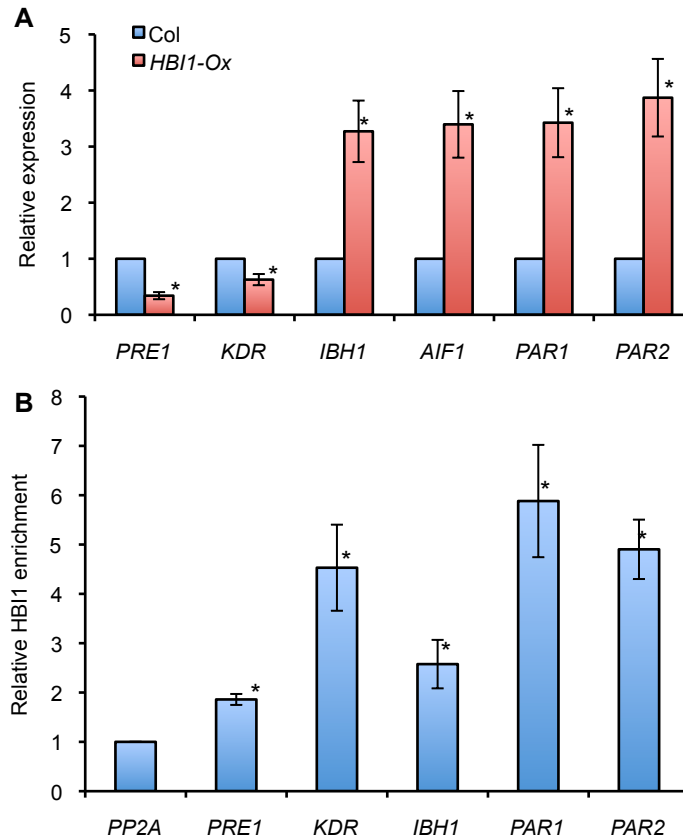

**Supplemental Figure 2. Growth-promoting and growth-inhibiting HLH factors are directly repressed and induced by HBI1, respectively.**

**(A)** Quantitative RT-PCR analysis of the expression of *PRE1*, *KDR*, *IBH1*, *AIF1*, *PAR1* and *PAR2*. *PP2A* was used as the internal control. The wild-type and *HBI1-Ox* plants were grown in half-strength MS medium under constant light for five days. Error bars indicate SD from three biological repeats. Asterisk indicates significant difference from wild-type (*t* test; \**P*<0.05).

**(B)** Quantitative ChIP-PCR analysis of HBI1 binding to the promoter of selected genes. The chromatin of *pHBI1::HBI1-YFP* and *35S::YFP* transgenic plants was immunoprecipitated with anti-YFP antibody, and the precipitated DNA was quantified by qPCR. Enrichment of DNA was calculated as the ratio between *pHBI1::HBI1-YFP* and *35S::YFP*, normalized to that of the *PP2A* coding region. Error bars indicate SD of three biological repeats. Asterisk indicates significant difference from control gene *PP2A* (*t* test; \**P*<0.05).

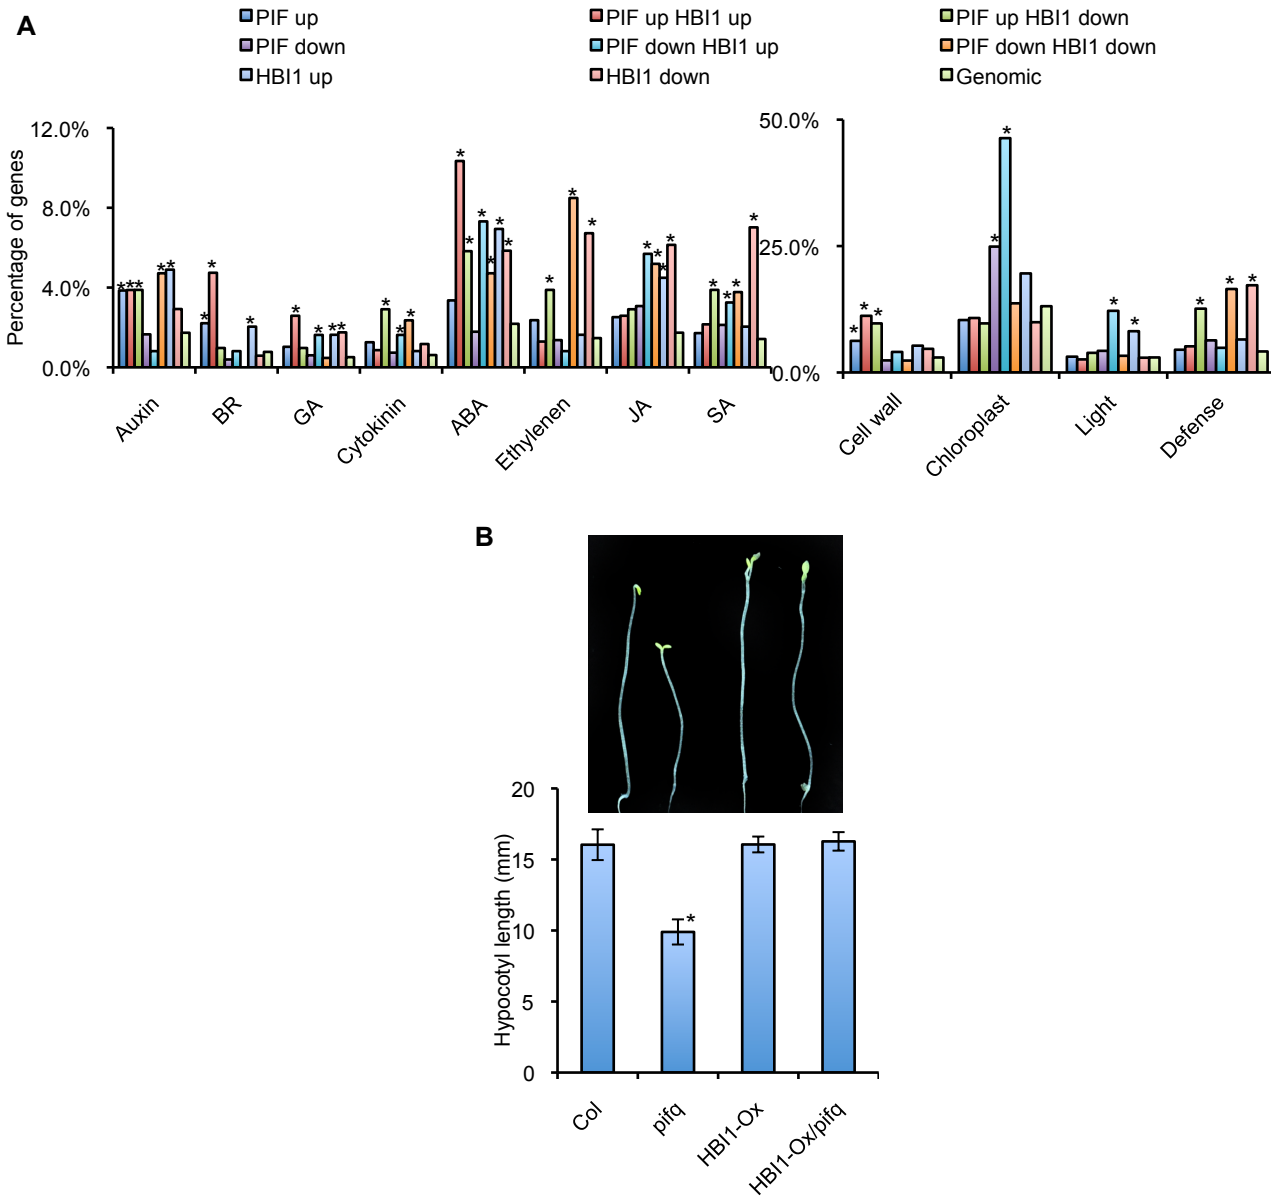

**Supplemental Figure 3. HBI1 and PIF have overlapping and distinct functions**

**(A)** GO analyses of HBI1- and PIF-regulated genes. Numbers indicate the percentage of genes belonging to each GO category. Asterisk indicates significant difference from genomic random (Fisher exact test; \* $P < 0.05$ ).

**(B)** Growth of wild-type, *pifq*, *HBI1-Ox* and *HBI1-Ox/pifq* in the dark for 6 days. Bottom graph shows the quantification of hypocotyl lengths. Asterisk indicates significant difference from wild-type (*t* test; \* $P < 0.05$ ). Error bars indicate SD from three biological repeats.

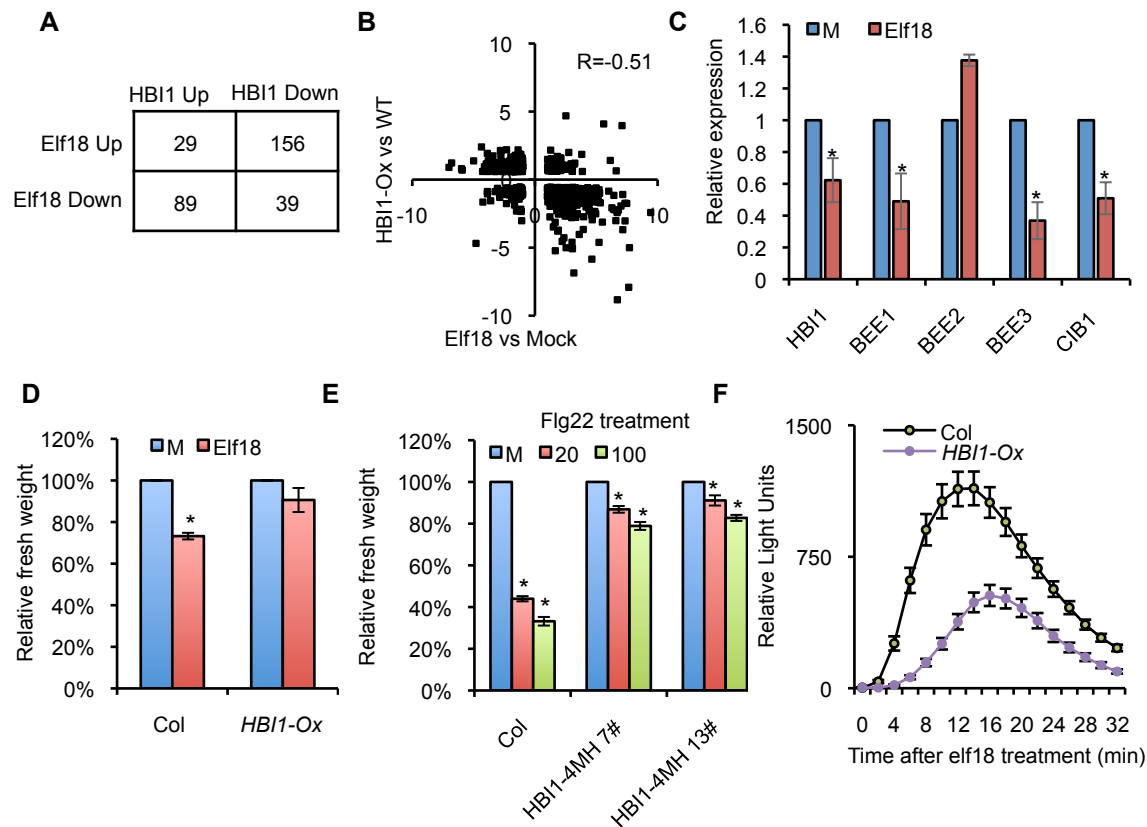

**Supplemental Figure 4. HBI1 negatively regulates elf18- and flg22-mediated PTI responses.**

**(A)** Table shows the overlaps between gene sets regulated by HBI1 and elf18.

**(B)** Scatter plot of log<sub>2</sub> fold change values of the genes co-regulated by HBI1 and elf18.

**(C)** Quantitative RT-PCR analysis of RNA levels of *HBI1* and its homologs in 4-week old plants treated with mock (M) or 1 μM elf18 for 3 hours. *PP2A* was used as the internal control. Error bars indicate SD from three biological repeats. Asterisk indicates significant difference from Col with mock treatment. (*t* test; \**P*<0.05).

**(D)** Elf18-dependent inhibition of wild-type (Col) and *HBI1-Ox* seedling growth. Seedlings were grown in half-strength MS medium for 5 days, then transferred to liquid half-strength MS medium without (M) or with 1 μM elf18 for another 8 days. Growth is represented relative to untreated plants. Error bars indicate SD from three biological repeats. Asterisk indicates significant difference from wild-type (*t* test; \**P*<0.05).

**(E)** Growth of wild-type (Col) and two independent lines of Ox-*HBI1-4MH* in the absence (M) or presence of flg22 (20 and 100 nM). Growth is represented as fresh weight relative to untreated plants. Error bars indicate SD from three biological repeats.

**(F)** Oxidative burst triggered by 1 μM elf18 in leaf discs of wild-type and *HBI1-Ox* plants. Error bars indicate SD from twelve biological repeats.

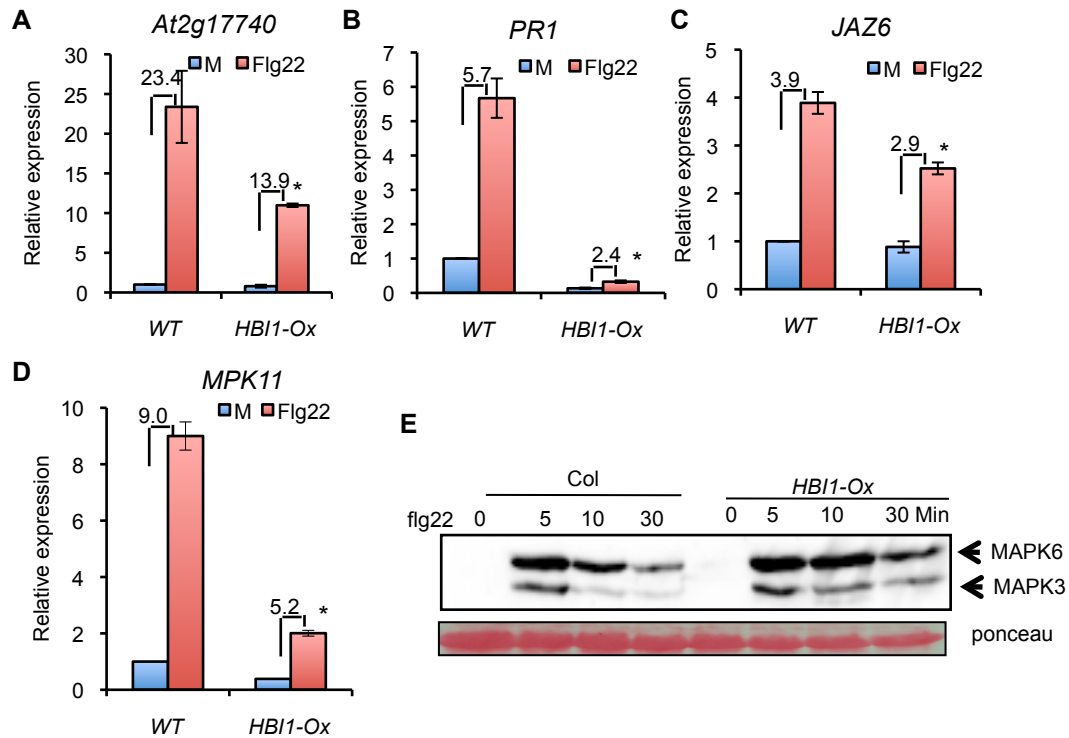

**Supplemental Figure 5. Activation of HBI1 results in the suppression of PTI marker gene expression, but not MAPK activation.**

(A-D) Quantitative RT-PCR analyses of flg22 effects on the expression of defense-related genes in wild type and *HBI1-Ox*. The wild-type and *HBI1-Ox* plants were grown in half-strength MS medium under constant light for 2 weeks, and then treated with mock (M) or 1  $\mu$ M flg22 for 3 hours. *PP2A* was used as the internal control. Error bars indicate SD from three biological repeats. Asterisk indicates significant difference from flg22 treatment between wild-type and *HBI1-Ox* (*t* test; \**P*<0.05).

(E) Immunoblot analysis of flg22-induced (1  $\mu$ M) MAPK phosphorylation in 2-week-old Col and *HBI1-Ox* seedlings. Arrowheads indicate phosphorylated MPK3 and MPK6. Blot stained with ponceau S is presented to show equal loading. Immunoblots were probed with anti-phospho-p44/42 MAPK (Erk1/2) (Thr202/Tyr204) antibody (Cell signaling).

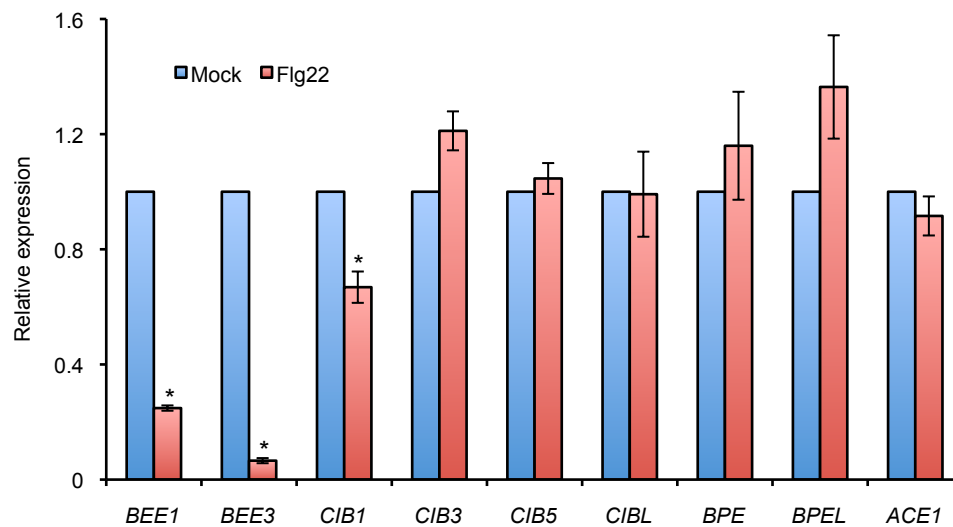

**Supplemental Figure 6. Quantitative RT-PCR analyses of flg22 effects on the expression of HBI1 homologous genes.**

The wild-type plants were grown in half-strength MS medium under constant light for 2 weeks, and then treated with mock or 1 μM flg22 for 3 hours. *PP2A* was used as the internal control. Error bars indicate SD from three biological repeats. Asterisks indicate significant difference from the mock treatment (*t* test; \**P*<0.05).

| Gene      | HBI1-Ox vs WT |         |
|-----------|---------------|---------|
|           | RT-qPCR       | RNA-Seq |
| At1g26380 | -8.25 ±0.54*  | -8.83   |
| At1g26420 | -3.96 ±0.06*  | -5      |
| WRKY33    | -2.65 ±0.05*  | -2.5    |
| At4g26120 | -2.22 ±0.27*  | -2.69   |
| VQ28      | -1.91 ±0.08*  | -2.24   |
| MPK11     | -2.35 ±0.12*  | -3.12   |
| KDR       | -1.78 ±0.1*   | -1.63   |
| BEE1      | -1.44 ±0.08*  | -1.29   |
| IBH1      | 0.79 ±0.04*   | 1.04    |
| AIF1      | 0.80 ±0.03*   | 1.02    |
| EXP8      | 1.00 ±0.05*   | 1.34    |
| EXP1      | 1.06 ±0.1*    | 1.04    |
| PIF4      | 1.04 ±0.07*   | 1.24    |

**Supplemental Table 1. Quantitative RT-PCR validation of the RNA-Seq data.**

Seedlings of wild-type (WT) and *HBI1-Ox* plants were grown in half-strength MS medium under constant light for 5 days. The RT-qPCR data were normalized to PP2A, and the average ratio (in log<sub>2</sub>) between *HBI1-Ox* and WT and the standard deviation were calculated from three biological repeats. \*Significant difference between *HBI1-Ox* and WT ( $p < 0.05$ ). RNA-Seq data are from Supplemental Table 2.

Supplemental Data. Fan et al. (2014). Plant Cell 10.1105/tpc.114.121111

| RT-PCR primers   |                              |
|------------------|------------------------------|
| PP2A RTF         | tatcggatgacgattcttcgtgcag    |
| PP2A RTR         | gcttggctgactatcggaatgagag    |
| EXP1RTF          | GCTTACCGAAGGCTTACCGAAG       |
| EXP1RTR          | CTTGACATCGCTTGCCATCCAG       |
| EXP8RTF          | tcctcctctcagcatttcgacct      |
| EXP8RTR          | cttgccacgactgtgttttgagc      |
| CPDRTF           | TTGCTCAACTCAAGGAAGAG         |
| CPDRTR           | TGATGTTAGCCACTCGTAGC         |
| DWF4RTF          | cataaagctcttcagtcacga        |
| DWF4RTR          | cgtctgttcttgttcctaa          |
| BR6OX1RTF        | TCGGGTTACGAAACTGTCTCTACG     |
| BR6OX1RTR        | CCTGAATGCCAAATGCTCAGCTC      |
| FRK1RTF          | ATCTTCGCTTGGAGCTTCTC         |
| FRK1RTR          | TGCAGCGCAAGGACTAGAG          |
| At2g17740 RTF    | TGCTCCATCTCTCTTTGTGC         |
| At2g17749 RTR    | ATGCGTTGCTGAAGAAGAGG         |
| PR1RTF           | AAGGGTTCACAACCAGGCAC         |
| PR1RTR           | CACTGCATGGGACCTACGC          |
| JAZ6RTF          | cggtgtgattcccgatctaacgag     |
| JAZ6RTR          | tgggaggaagatgactaccgtgttg    |
| HBI1RTF          | TGCCTGGATGCAATAAGGTCACAG     |
| HBI1RTR          | TGGAGCTTCGATAGATGTCGTTTGG    |
| BEE2RTF          | CAGTTTCAGGCTTACTTCACAGGT     |
| BEE2RTR          | CTTTAGCGCCGAGAGATGTGGT       |
| BEE1RTF          | TGGTGCCCGGATGTTATAAGGC       |
| BEE1RTR          | GCTGCAGTGAGTTTCATCGAGAGG     |
| BEE3RTF          | TGCTGTGGAATCCATGCAGAAG       |
| BEE3RTR          | AGGGTCCACGATGATGAATGGAAG     |
| CIB1RTF          | aggccggatttggatggatgac       |
| CIB1RTR          | ttgctgcattggattgacatgaagg    |
| CIB5RTF          | TGTCCACATGAACCATGAAACCG      |
| CIB5RTR          | CTCCACCTTCATGTCAGCTGTTG      |
| ACE1RTF          | GCAACTGTGAACCCACAAATGGAC     |
| ACE1RTR          | ACCAGCTCGTAGTTGAAGTGCATC     |
|                  |                              |
|                  |                              |
| ChIP-PCR primers |                              |
| PP2A ChIP-F      | CGGCTTTCATGATTCCCTCT         |
| PP2A ChIP-R      | GCCTTAAGCTCCGTTTCTACTT       |
| EXP1ChIPF        | TGTATGCGAAGCACACAAAGACATC    |
| EXP1ChIPR        | GATGGAGGTGCCTTAATATAAACGC    |
| EXP8ChIPF        | CACAACCTTCAAAGTCCCT          |
| EXP8ChIPR        | CAACAATGTATGCCACCG           |
| DWF4ChIPF        | acgagaaaacgcatgtgaaattgg     |
| DWF4ChIPR        | gatacttgggcacgtccatgtgttc    |
| CPDChIPF         | gagagacatgtgaagtgtcatag      |
| CPDChIPR         | gttcgatgaatgtagtcaggttagattc |
| BR6OX1ChIPF      | accgtaatcatggttagcctagac     |
| BR6OX1ChIPR      | tgcttggatgattgagcgcacg       |

Supplemental Table 2. Oligonucleotide sequences used in this paper
